# Supplementary material for: Glycosylation site occupancy in health, congenital disorder of glycosylation and fatty liver disease
Source: PubMed Central journal article supplement (PMC5057071; doi:10.1038/srep33927), 2016-10-11
Supplement: srep33927-s1.pdf [file srep33927-s1.pdf]

# Glycosylation site occupancy in health, congenital disorder of glycosylation and fatty liver disease

Andreas J. Hülsmeier<sup>‡§</sup>, Micha Tobler<sup>¶</sup>, Patricie Burda<sup>¶</sup> and Thierry Hennet<sup>‡</sup>

From the <sup>‡</sup>Institute of Physiology, University of Zürich, Winterthurerstrasse 190, 8057 Zürich, Switzerland and <sup>¶</sup>Division of Metabolism and Molecular Pediatrics, University Children's Hospital Zürich, Steinwiesstrasse 75, 8032 Zürich, Switzerland

§To whom correspondence should be addressed. Tel.: 41-44-635-5104; Fax: 41-44-635-6814;

E-mail: [andreas.huelsmeier@uzh.ch](mailto:andreas.huelsmeier@uzh.ch)

**Supplemental Table 1** MRM transitions

**Supplemental Table 2** <sup>16</sup>O deamination reactions

**Supplemental Figure 1.** Isoelectric focusing gel electrophoresis of transferrin of the samples analyzed.

**Supplemental Figure 2.** Western-blot analyses of haptoglobin of the samples analyzed.

**Supplemental Table 3** Statistical comparison of the CDG and NAFLD disease groups.

**Supplemental Figure 3.** MALDI-TOF-MS of the standard peptide mix.

**Supplemental Table 1** MRM transitions

| Q1         | Q3         | dwel time<br>(ms) | description                                                                     | CE<br>(V) |
|------------|------------|-------------------|---------------------------------------------------------------------------------|-----------|
| 725.850866 | 595.302078 | 15                | sp P02787 TRFE_HUMAN.ILRQQQHFLFGSN[DeW]VTD<br>C[CAM]SGNFC[CAM]LFR.+4y4.light    | 31        |
| 725.850866 | 762.912004 | 15                | sp P02787 TRFE_HUMAN.ILRQQQHFLFGSN[DeW]VTD<br>C[CAM]SGNFC[CAM]LFR.+4b13+2.light | 31        |
| 725.850866 | 813.435843 | 15                | sp P02787 TRFE_HUMAN.ILRQQQHFLFGSN[DeW]VTD<br>C[CAM]SGNFC[CAM]LFR.+4b14+2.light | 31        |
| 725.850866 | 870.949315 | 15                | sp P02787 TRFE_HUMAN.ILRQQQHFLFGSN[DeW]VTD<br>C[CAM]SGNFC[CAM]LFR.+4b15+2.light | 31        |
| 725.103801 | 595.302078 | 15                | sp P02787 TRFE_HUMAN.ILRQQQHFLFGSNVTDC[CAM<br>]SGNFC[CAM]LFR.+4y4.light         | 31        |
| 725.103801 | 761.417874 | 15                | sp P02787 TRFE_HUMAN.ILRQQQHFLFGSNVTDC[CAM<br>]SGNFC[CAM]LFR.+4b13+2.light      | 31        |
| 725.103801 | 811.941713 | 15                | sp P02787 TRFE_HUMAN.ILRQQQHFLFGSNVTDC[CAM<br>]SGNFC[CAM]LFR.+4b14+2.light      | 31        |
| 725.103801 | 869.455184 | 15                | sp P02787 TRFE_HUMAN.ILRQQQHFLFGSNVTDC[CAM<br>]SGNFC[CAM]LFR.+4b15+2.light      | 31        |
| 727.605868 | 605.310347 | 15                | sp P02787 TRFE_HUMAN.ILRQQQHFLFGSNVTDC[CAM<br>]SGNFC[CAM]LFR.+4y4.heavy         | 31        |
| 727.605868 | 761.417874 | 15                | sp P02787 TRFE_HUMAN.ILRQQQHFLFGSNVTDC[CAM<br>]SGNFC[CAM]LFR.+4b13+2.heavy      | 31        |
| 727.605868 | 811.941713 | 15                | sp P02787 TRFE_HUMAN.ILRQQQHFLFGSNVTDC[CAM<br>]SGNFC[CAM]LFR.+4b14+2.heavy      | 31        |
| 727.605868 | 869.455184 | 15                | sp P02787 TRFE_HUMAN.ILRQQQHFLFGSNVTDC[CAM<br>]SGNFC[CAM]LFR.+4b15+2.heavy      | 31        |
| 966.797315 | 1160.49756 | 15                | sp P02787 TRFE_HUMAN.ILRQQQHFLFGSN[+1]VTDC[<br>CAM]SGNFC[CAM]LFR.+3y9.light     | 44        |
| 966.797315 | 712.375675 | 15                | sp P02787 TRFE_HUMAN.ILRQQQHFLFGSN[+1]VTDC[<br>CAM]SGNFC[CAM]LFR.+3b12+2.light  | 44        |
| 966.797315 | 761.909882 | 15                | sp P02787 TRFE_HUMAN.ILRQQQHFLFGSN[+1]VTDC[<br>CAM]SGNFC[CAM]LFR.+3b13+2.light  | 44        |
| 966.797315 | 869.947192 | 15                | sp P02787 TRFE_HUMAN.ILRQQQHFLFGSN[+1]VTDC[<br>CAM]SGNFC[CAM]LFR.+3b15+2.light  | 44        |
| 725.349805 | 595.302078 | 15                | sp P02787 TRFE_HUMAN.ILRQQQHFLFGSN[+1]VTDC[<br>CAM]SGNFC[CAM]LFR.+4y4.light     | 31        |
| 725.349805 | 761.909882 | 15                | sp P02787 TRFE_HUMAN.ILRQQQHFLFGSN[+1]VTDC[<br>CAM]SGNFC[CAM]LFR.+4b13+2.light  | 31        |
| 725.349805 | 812.433721 | 15                | sp P02787 TRFE_HUMAN.ILRQQQHFLFGSN[+1]VTDC[<br>CAM]SGNFC[CAM]LFR.+4b14+2.light  | 31        |
| 725.349805 | 869.947192 | 15                | sp P02787 TRFE_HUMAN.ILRQQQHFLFGSN[+1]VTDC[<br>CAM]SGNFC[CAM]LFR.+4b15+2.light  | 31        |
| 727.851872 | 605.310347 | 15                | sp P02787 TRFE_HUMAN.ILRQQQHFLFGSN[+1]VTDC[<br>CAM]SGNFC[CAM]LFR.+4y4.heavy     | 31        |
| 727.851872 | 761.909882 | 15                | sp P02787 TRFE_HUMAN.ILRQQQHFLFGSN[+1]VTDC[<br>CAM]SGNFC[CAM]LFR.+4b13+2.heavy  | 31        |
| 727.851872 | 812.433721 | 15                | sp P02787 TRFE_HUMAN.ILRQQQHFLFGSN[+1]VTDC[<br>CAM]SGNFC[CAM]LFR.+4b14+2.heavy  | 31        |
| 727.851872 | 869.947192 | 15                | sp P02787 TRFE_HUMAN.ILRQQQHFLFGSN[+1]VTDC[<br>CAM]SGNFC[CAM]LFR.+4b15+2.heavy  | 31        |

|            |             |    |                                                                           |    |
|------------|-------------|----|---------------------------------------------------------------------------|----|
|            |             |    | CAM]SGNFC[CAM]LFR.+4b15+2.heavy                                           |    |
| 821.907116 | 902.425253  | 15 | sp P01859 IGHG2_HUMAN.TKPREEQFN[DeW]STFR.+2y7.light                       | 48 |
| 821.907116 | 510.267073  | 15 | sp P01859 IGHG2_HUMAN.TKPREEQFN[DeW]STFR.+2y4.light                       | 48 |
| 821.907116 | 707.335795  | 15 | sp P01859 IGHG2_HUMAN.TKPREEQFN[DeW]STFR.+2y11+2.light                    | 48 |
| 821.907116 | 1133.547159 | 15 | sp P01859 IGHG2_HUMAN.TKPREEQFN[DeW]STFR.+2b9.light                       | 48 |
| 820.412985 | 899.436992  | 15 | sp P01859 IGHG2_HUMAN.TKPREEQFNSTFR.+2y7.lig                              | 48 |
| 820.412985 | 510.267073  | 15 | sp P01859 IGHG2_HUMAN.TKPREEQFNSTFR.+2y4.lig                              | 48 |
| 820.412985 | 705.841664  | 15 | sp P01859 IGHG2_HUMAN.TKPREEQFNSTFR.+2y11+2.light                         | 48 |
| 820.412985 | 1130.558898 | 15 | sp P01859 IGHG2_HUMAN.TKPREEQFNSTFR.+2b9.lig                              | 48 |
| 825.41712  | 909.445261  | 15 | sp P01859 IGHG2_HUMAN.TKPREEQFNSTFR.+2y7.he                               | 48 |
| 825.41712  | 520.275342  | 15 | sp P01859 IGHG2_HUMAN.TKPREEQFNSTFR.+2y4.he                               | 48 |
| 825.41712  | 710.845799  | 15 | sp P01859 IGHG2_HUMAN.TKPREEQFNSTFR.+2y11+2.heavy                         | 48 |
| 825.41712  | 1130.558898 | 15 | sp P01859 IGHG2_HUMAN.TKPREEQFNSTFR.+2b9.he                               | 48 |
| 820.904993 | 900.421008  | 15 | sp P01859 IGHG2_HUMAN.TKPREEQFN[+1]STFR.+2y7.light                        | 48 |
| 820.904993 | 510.267073  | 15 | sp P01859 IGHG2_HUMAN.TKPREEQFN[+1]STFR.+2y4.light                        | 48 |
| 820.904993 | 706.333672  | 15 | sp P01859 IGHG2_HUMAN.TKPREEQFN[+1]STFR.+2y11+2.light                     | 48 |
| 820.904993 | 1131.542914 | 15 | sp P01859 IGHG2_HUMAN.TKPREEQFN[+1]STFR.+2b9.light                        | 48 |
| 825.909128 | 910.429277  | 15 | sp P01859 IGHG2_HUMAN.TKPREEQFN[+1]STFR.+2y7.heavy                        | 48 |
| 825.909128 | 520.275342  | 15 | sp P01859 IGHG2_HUMAN.TKPREEQFN[+1]STFR.+2y4.heavy                        | 48 |
| 825.909128 | 711.337807  | 15 | sp P01859 IGHG2_HUMAN.TKPREEQFN[+1]STFR.+2y11+2.heavy                     | 48 |
| 825.909128 | 1131.542914 | 15 | sp P01859 IGHG2_HUMAN.TKPREEQFN[+1]STFR.+2b9.heavy                        | 48 |
| 989.533693 | 1222.634594 | 15 | sp P01876 IGHA1_HUMAN.LSLHRPALEDLLLGSEAN[DeW]LTC[CAM]TLTGLR.+3y11.light   | 45 |
| 989.533693 | 1151.59748  | 15 | sp P01876 IGHA1_HUMAN.LSLHRPALEDLLLGSEAN[DeW]LTC[CAM]TLTGLR.+3y10.light   | 45 |
| 989.533693 | 1245.694997 | 15 | sp P01876 IGHA1_HUMAN.LSLHRPALEDLLLGSEAN[DeW]LTC[CAM]TLTGLR.+3b11.light   | 45 |
| 989.533693 | 679.893169  | 15 | sp P01876 IGHA1_HUMAN.LSLHRPALEDLLLGSEAN[DeW]LTC[CAM]TLTGLR.+3b12+2.light | 45 |
| 742.402089 | 820.434549  | 15 | sp P01876 IGHA1_HUMAN.LSLHRPALEDLLLGSEAN[DeW]LTC[CAM]TLTGLR.+4y7.light    | 32 |
| 742.402089 | 888.541397  | 15 | sp P01876 IGHA1_HUMAN.LSLHRPALEDLLLGSEAN[DeW]LTC[CAM]TLTGLR.+4b8.light    | 32 |

|            |             |    |                                            |    |
|------------|-------------|----|--------------------------------------------|----|
| 742.402089 | 679.893169  | 15 | sp P01876 IGHA1_HUMAN.LSLHRPALEDLLLGSEAN[D | 32 |
|            |             |    | eW]LTC[CAM]TLTGRL.+4b12+2.light            |    |
| 742.402089 | 967.017394  | 15 | sp P01876 IGHA1_HUMAN.LSLHRPALEDLLLGSEAN[D | 32 |
|            |             |    | eW]LTC[CAM]TLTGRL.+4b18+2.light            |    |
| 988.537606 | 1219.646333 | 15 | sp P01876 IGHA1_HUMAN.LSLHRPALEDLLLGSEANLT | 45 |
|            |             |    | C[CAM]TLTGRL.+3y11.light                   |    |
| 988.537606 | 1148.609219 | 15 | sp P01876 IGHA1_HUMAN.LSLHRPALEDLLLGSEANLT | 45 |
|            |             |    | C[CAM]TLTGRL.+3y10.light                   |    |
| 988.537606 | 1245.694997 | 15 | sp P01876 IGHA1_HUMAN.LSLHRPALEDLLLGSEANLT | 45 |
|            |             |    | C[CAM]TLTGRL.+3b11.light                   |    |
| 988.537606 | 679.893169  | 15 | sp P01876 IGHA1_HUMAN.LSLHRPALEDLLLGSEANLT | 45 |
|            |             |    | C[CAM]TLTGRL.+3b12+2.light                 |    |
| 991.873696 | 1229.654602 | 15 | sp P01876 IGHA1_HUMAN.LSLHRPALEDLLLGSEANLT | 45 |
|            |             |    | C[CAM]TLTGRL.+3y11.heavy                   |    |
| 991.873696 | 1158.617488 | 15 | sp P01876 IGHA1_HUMAN.LSLHRPALEDLLLGSEANLT | 45 |
|            |             |    | C[CAM]TLTGRL.+3y10.heavy                   |    |
| 991.873696 | 1245.694997 | 15 | sp P01876 IGHA1_HUMAN.LSLHRPALEDLLLGSEANLT | 45 |
|            |             |    | C[CAM]TLTGRL.+3b11.heavy                   |    |
| 991.873696 | 679.893169  | 15 | sp P01876 IGHA1_HUMAN.LSLHRPALEDLLLGSEANLT | 45 |
|            |             |    | C[CAM]TLTGRL.+3b12+2.heavy                 |    |
| 741.655024 | 820.434549  | 15 | sp P01876 IGHA1_HUMAN.LSLHRPALEDLLLGSEANLT | 32 |
|            |             |    | C[CAM]TLTGRL.+4y7.light                    |    |
| 741.655024 | 888.541397  | 15 | sp P01876 IGHA1_HUMAN.LSLHRPALEDLLLGSEANLT | 32 |
|            |             |    | C[CAM]TLTGRL.+4b8.light                    |    |
| 741.655024 | 679.893169  | 15 | sp P01876 IGHA1_HUMAN.LSLHRPALEDLLLGSEANLT | 32 |
|            |             |    | C[CAM]TLTGRL.+4b12+2.light                 |    |
| 741.655024 | 965.523264  | 15 | sp P01876 IGHA1_HUMAN.LSLHRPALEDLLLGSEANLT | 32 |
|            |             |    | C[CAM]TLTGRL.+4b18+2.light                 |    |
| 744.157091 | 830.442818  | 15 | sp P01876 IGHA1_HUMAN.LSLHRPALEDLLLGSEANLT | 32 |
|            |             |    | C[CAM]TLTGRL.+4y7.heavy                    |    |
| 744.157091 | 888.541397  | 15 | sp P01876 IGHA1_HUMAN.LSLHRPALEDLLLGSEANLT | 32 |
|            |             |    | C[CAM]TLTGRL.+4b8.heavy                    |    |
| 744.157091 | 679.893169  | 15 | sp P01876 IGHA1_HUMAN.LSLHRPALEDLLLGSEANLT | 32 |
|            |             |    | C[CAM]TLTGRL.+4b12+2.heavy                 |    |
| 744.157091 | 965.523264  | 15 | sp P01876 IGHA1_HUMAN.LSLHRPALEDLLLGSEANLT | 32 |
|            |             |    | C[CAM]TLTGRL.+4b18+2.heavy                 |    |
| 988.865612 | 1220.630349 | 15 | sp P01876 IGHA1_HUMAN.LSLHRPALEDLLLGSEAN[+ | 45 |
|            |             |    | 1]LTC[CAM]TLTGRL.+3y11.light               |    |
| 988.865612 | 1149.593235 | 15 | sp P01876 IGHA1_HUMAN.LSLHRPALEDLLLGSEAN[+ | 45 |
|            |             |    | 1]LTC[CAM]TLTGRL.+3y10.light               |    |
| 988.865612 | 1245.694997 | 15 | sp P01876 IGHA1_HUMAN.LSLHRPALEDLLLGSEAN[+ | 45 |
|            |             |    | 1]LTC[CAM]TLTGRL.+3b11.light               |    |
| 988.865612 | 679.893169  | 15 | sp P01876 IGHA1_HUMAN.LSLHRPALEDLLLGSEAN[+ | 45 |
|            |             |    | 1]LTC[CAM]TLTGRL.+3b12+2.light             |    |
| 992.201701 | 1230.638618 | 15 | sp P01876 IGHA1_HUMAN.LSLHRPALEDLLLGSEAN[+ | 45 |
|            |             |    | 1]LTC[CAM]TLTGRL.+3y11.heavy               |    |
| 992.201701 | 1159.601504 | 15 | sp P01876 IGHA1_HUMAN.LSLHRPALEDLLLGSEAN[+ | 45 |
|            |             |    | 1]LTC[CAM]TLTGRL.+3y10.heavy               |    |
| 992.201701 | 1245.694997 | 15 | sp P01876 IGHA1_HUMAN.LSLHRPALEDLLLGSEAN[+ | 45 |
|            |             |    | 1]LTC[CAM]TLTGRL.+3b11.heavy               |    |
| 992.201701 | 679.893169  | 15 | sp P01876 IGHA1_HUMAN.LSLHRPALEDLLLGSEAN[+ | 45 |
|            |             |    | 1]LTC[CAM]TLTGRL.+3b12+2.heavy             |    |
| 741.901028 | 820.434549  | 15 | sp P01876 IGHA1_HUMAN.LSLHRPALEDLLLGSEAN[+ | 32 |

|            |             |    |                                              |    |
|------------|-------------|----|----------------------------------------------|----|
|            |             |    | 1]LTC[CAM]TLTGLR.+4y7.light                  |    |
| 741.901028 | 888.541397  | 15 | sp P01876 IGHA1_HUMAN.LSLHRPALEDLLLGSEAN[+   | 32 |
|            |             |    | 1]LTC[CAM]TLTGLR.+4b8.light                  |    |
| 741.901028 | 679.893169  | 15 | sp P01876 IGHA1_HUMAN.LSLHRPALEDLLLGSEAN[+   | 32 |
|            |             |    | 1]LTC[CAM]TLTGLR.+4b12+2.light               |    |
| 741.901028 | 966.015272  | 15 | sp P01876 IGHA1_HUMAN.LSLHRPALEDLLLGSEAN[+   | 32 |
|            |             |    | 1]LTC[CAM]TLTGLR.+4b18+2.light               |    |
| 744.403095 | 830.442818  | 15 | sp P01876 IGHA1_HUMAN.LSLHRPALEDLLLGSEAN[+   | 32 |
|            |             |    | 1]LTC[CAM]TLTGLR.+4y7.heavy                  |    |
| 744.403095 | 888.541397  | 15 | sp P01876 IGHA1_HUMAN.LSLHRPALEDLLLGSEAN[+   | 32 |
|            |             |    | 1]LTC[CAM]TLTGLR.+4b8.heavy                  |    |
| 744.403095 | 679.893169  | 15 | sp P01876 IGHA1_HUMAN.LSLHRPALEDLLLGSEAN[+   | 32 |
|            |             |    | 1]LTC[CAM]TLTGLR.+4b12+2.heavy               |    |
| 744.403095 | 966.015272  | 15 | sp P01876 IGHA1_HUMAN.LSLHRPALEDLLLGSEAN[+   | 32 |
|            |             |    | 1]LTC[CAM]TLTGLR.+4b18+2.heavy               |    |
| 600.004686 | 658.413403  | 15 | sp P00738 HPT_HUMAN.VVLHPN[DeW]YSQVDIGLIK.   | 22 |
|            |             |    | +3y6.light                                   |    |
| 600.004686 | 800.434978  | 15 | sp P00738 HPT_HUMAN.VVLHPN[DeW]YSQVDIGLIK.   | 22 |
|            |             |    | +3y14+2.light                                |    |
| 600.004686 | 1041.524967 | 15 | sp P00738 HPT_HUMAN.VVLHPN[DeW]YSQVDIGLIK.   | 22 |
|            |             |    | +3b9.light                                   |    |
| 600.004686 | 570.800328  | 15 | sp P00738 HPT_HUMAN.VVLHPN[DeW]YSQVDIGLIK.   | 22 |
|            |             |    | +3b10+2.light                                |    |
| 599.008599 | 658.413403  | 15 | sp P00738 HPT_HUMAN.VVLHPNYSQVDIGLIK.+3y6.li | 22 |
|            |             |    | ght                                          |    |
| 599.008599 | 798.940847  | 15 | sp P00738 HPT_HUMAN.VVLHPNYSQVDIGLIK.+3y14   | 22 |
|            |             |    | +2.light                                     |    |
| 599.008599 | 1038.536706 | 15 | sp P00738 HPT_HUMAN.VVLHPNYSQVDIGLIK.+3b9.li | 22 |
|            |             |    | ght                                          |    |
| 599.008599 | 569.306198  | 15 | sp P00738 HPT_HUMAN.VVLHPNYSQVDIGLIK.+3b10   | 22 |
|            |             |    | +2.light                                     |    |
| 601.679999 | 666.427602  | 15 | sp P00738 HPT_HUMAN.VVLHPNYSQVDIGLIK.+3y6.h  | 22 |
|            |             |    | eavy                                         |    |
| 601.679999 | 802.947947  | 15 | sp P00738 HPT_HUMAN.VVLHPNYSQVDIGLIK.+3y14   | 22 |
|            |             |    | +2.heavy                                     |    |
| 601.679999 | 1038.536706 | 15 | sp P00738 HPT_HUMAN.VVLHPNYSQVDIGLIK.+3b9.h  | 22 |
|            |             |    | eavy                                         |    |
| 601.679999 | 569.306198  | 15 | sp P00738 HPT_HUMAN.VVLHPNYSQVDIGLIK.+3b10   | 22 |
|            |             |    | +2.heavy                                     |    |
| 599.336605 | 658.413403  | 15 | sp P00738 HPT_HUMAN.VVLHPN[+1]YSQVDIGLIK.+3  | 22 |
|            |             |    | y6.light                                     |    |
| 599.336605 | 799.432855  | 15 | sp P00738 HPT_HUMAN.VVLHPN[+1]YSQVDIGLIK.+3  | 22 |
|            |             |    | y14+2.light                                  |    |
| 599.336605 | 1039.520722 | 15 | sp P00738 HPT_HUMAN.VVLHPN[+1]YSQVDIGLIK.+3  | 22 |
|            |             |    | b9.light                                     |    |
| 599.336605 | 569.798206  | 15 | sp P00738 HPT_HUMAN.VVLHPN[+1]YSQVDIGLIK.+3  | 22 |
|            |             |    | b10+2.light                                  |    |
| 602.008004 | 666.427602  | 15 | sp P00738 HPT_HUMAN.VVLHPN[+1]YSQVDIGLIK.+3  | 22 |
|            |             |    | y6.heavy                                     |    |
| 602.008004 | 803.439955  | 15 | sp P00738 HPT_HUMAN.VVLHPN[+1]YSQVDIGLIK.+3  | 22 |
|            |             |    | y14+2.heavy                                  |    |
| 602.008004 | 1039.520722 | 15 | sp P00738 HPT_HUMAN.VVLHPN[+1]YSQVDIGLIK.+3  | 22 |
|            |             |    | b9.heavy                                     |    |

|             |             |    |                                                                                       |    |
|-------------|-------------|----|---------------------------------------------------------------------------------------|----|
| 602.008004  | 569.798206  | 15 | sp P00738 HPT_HUMAN.VVLHPN[+1]YSQVDIGLIK.+3<br>b10+2.heavy                            | 22 |
| 1125.879312 | 915.424044  | 15 | sp P04003 C4BPA_HUMAN.FSLLGHASISC[CAM]TVEN<br>[DeW]ETIGVWRPSPPTC[CAM]EK.+3y8.light    | 55 |
| 1125.879312 | 1182.04824  | 15 | sp P04003 C4BPA_HUMAN.FSLLGHASISC[CAM]TVEN<br>[DeW]ETIGVWRPSPPTC[CAM]EK.+3y20+2.light | 55 |
| 1125.879312 | 1010.482527 | 15 | sp P04003 C4BPA_HUMAN.FSLLGHASISC[CAM]TVEN<br>[DeW]ETIGVWRPSPPTC[CAM]EK.+3b19+2.light | 55 |
| 1125.879312 | 1231.106946 | 15 | sp P04003 C4BPA_HUMAN.FSLLGHASISC[CAM]TVEN<br>[DeW]ETIGVWRPSPPTC[CAM]EK.+3b22+2.light | 55 |
| 844.661303  | 915.424044  | 15 | sp P04003 C4BPA_HUMAN.FSLLGHASISC[CAM]TVEN<br>[DeW]ETIGVWRPSPPTC[CAM]EK.+4y8.light    | 40 |
| 844.661303  | 1001.974869 | 15 | sp P04003 C4BPA_HUMAN.FSLLGHASISC[CAM]TVEN<br>[DeW]ETIGVWRPSPPTC[CAM]EK.+4y17+2.light | 40 |
| 844.661303  | 937.453573  | 15 | sp P04003 C4BPA_HUMAN.FSLLGHASISC[CAM]TVEN<br>[DeW]ETIGVWRPSPPTC[CAM]EK.+4y16+2.light | 40 |
| 844.661303  | 707.350811  | 15 | sp P04003 C4BPA_HUMAN.FSLLGHASISC[CAM]TVEN<br>[DeW]ETIGVWRPSPPTC[CAM]EK.+4y12+2.light | 40 |
| 1124.883225 | 915.424044  | 15 | sp P04003 C4BPA_HUMAN.FSLLGHASISC[CAM]TVEN<br>ETIGVWRPSPPTC[CAM]EK.+3y8.light         | 55 |
| 1124.883225 | 1180.554109 | 15 | sp P04003 C4BPA_HUMAN.FSLLGHASISC[CAM]TVEN<br>ETIGVWRPSPPTC[CAM]EK.+3y20+2.light      | 55 |
| 1124.883225 | 1008.988397 | 15 | sp P04003 C4BPA_HUMAN.FSLLGHASISC[CAM]TVEN<br>ETIGVWRPSPPTC[CAM]EK.+3b19+2.light      | 55 |
| 1124.883225 | 1229.612816 | 15 | sp P04003 C4BPA_HUMAN.FSLLGHASISC[CAM]TVEN<br>ETIGVWRPSPPTC[CAM]EK.+3b22+2.light      | 55 |
| 1127.554625 | 923.438243  | 15 | sp P04003 C4BPA_HUMAN.FSLLGHASISC[CAM]TVEN<br>ETIGVWRPSPPTC[CAM]EK.+3y8.heavy         | 55 |
| 1127.554625 | 1184.561209 | 15 | sp P04003 C4BPA_HUMAN.FSLLGHASISC[CAM]TVEN<br>ETIGVWRPSPPTC[CAM]EK.+3y20+2.heavy      | 55 |
| 1127.554625 | 1008.988397 | 15 | sp P04003 C4BPA_HUMAN.FSLLGHASISC[CAM]TVEN<br>ETIGVWRPSPPTC[CAM]EK.+3b19+2.heavy      | 55 |
| 1127.554625 | 1229.612816 | 15 | sp P04003 C4BPA_HUMAN.FSLLGHASISC[CAM]TVEN<br>ETIGVWRPSPPTC[CAM]EK.+3b22+2.heavy      | 55 |
| 843.914238  | 915.424044  | 15 | sp P04003 C4BPA_HUMAN.FSLLGHASISC[CAM]TVEN<br>ETIGVWRPSPPTC[CAM]EK.+4y8.light         | 40 |
| 843.914238  | 1000.480739 | 15 | sp P04003 C4BPA_HUMAN.FSLLGHASISC[CAM]TVEN<br>ETIGVWRPSPPTC[CAM]EK.+4y17+2.light      | 40 |
| 843.914238  | 935.959442  | 15 | sp P04003 C4BPA_HUMAN.FSLLGHASISC[CAM]TVEN<br>ETIGVWRPSPPTC[CAM]EK.+4y16+2.light      | 40 |
| 843.914238  | 707.350811  | 15 | sp P04003 C4BPA_HUMAN.FSLLGHASISC[CAM]TVEN<br>ETIGVWRPSPPTC[CAM]EK.+4y12+2.light      | 40 |
| 845.917788  | 923.438243  | 15 | sp P04003 C4BPA_HUMAN.FSLLGHASISC[CAM]TVEN<br>ETIGVWRPSPPTC[CAM]EK.+4y8.heavy         | 40 |
| 845.917788  | 1004.487838 | 15 | sp P04003 C4BPA_HUMAN.FSLLGHASISC[CAM]TVEN<br>ETIGVWRPSPPTC[CAM]EK.+4y17+2.heavy      | 40 |
| 845.917788  | 939.966542  | 15 | sp P04003 C4BPA_HUMAN.FSLLGHASISC[CAM]TVEN<br>ETIGVWRPSPPTC[CAM]EK.+4y16+2.heavy      | 40 |
| 845.917788  | 711.35791   | 15 | sp P04003 C4BPA_HUMAN.FSLLGHASISC[CAM]TVEN<br>ETIGVWRPSPPTC[CAM]EK.+4y12+2.heavy      | 40 |
| 1125.211231 | 915.424044  | 15 | sp P04003 C4BPA_HUMAN.FSLLGHASISC[CAM]TVEN<br>[+1]ETIGVWRPSPPTC[CAM]EK.+3y8.light     | 55 |
| 1125.211231 | 1181.046117 | 15 | sp P04003 C4BPA_HUMAN.FSLLGHASISC[CAM]TVEN                                            | 55 |

|             |             |    |                                                                                     |    |
|-------------|-------------|----|-------------------------------------------------------------------------------------|----|
| 1125.211231 | 1009.480405 | 15 | [+1]ETIGVWRSPPTC[CAM]EK.+3y20+2.light<br>sp P04003 C4BPA_HUMAN.FSLLGHASISC[CAM]TVEN | 55 |
| 1125.211231 | 1230.104824 | 15 | [+1]ETIGVWRSPPTC[CAM]EK.+3b19+2.light<br>sp P04003 C4BPA_HUMAN.FSLLGHASISC[CAM]TVEN | 55 |
| 1127.88263  | 923.438243  | 15 | [+1]ETIGVWRSPPTC[CAM]EK.+3b22+2.light<br>sp P04003 C4BPA_HUMAN.FSLLGHASISC[CAM]TVEN | 55 |
| 1127.88263  | 1185.053217 | 15 | [+1]ETIGVWRSPPTC[CAM]EK.+3y8.heavy<br>sp P04003 C4BPA_HUMAN.FSLLGHASISC[CAM]TVEN    | 55 |
| 1127.88263  | 1009.480405 | 15 | [+1]ETIGVWRSPPTC[CAM]EK.+3y20+2.heavy<br>sp P04003 C4BPA_HUMAN.FSLLGHASISC[CAM]TVEN | 55 |
| 1127.88263  | 1230.104824 | 15 | [+1]ETIGVWRSPPTC[CAM]EK.+3b19+2.heavy<br>sp P04003 C4BPA_HUMAN.FSLLGHASISC[CAM]TVEN | 55 |
| 844.160242  | 915.424044  | 15 | [+1]ETIGVWRSPPTC[CAM]EK.+3b22+2.heavy<br>sp P04003 C4BPA_HUMAN.FSLLGHASISC[CAM]TVEN | 40 |
| 844.160242  | 1000.972747 | 15 | [+1]ETIGVWRSPPTC[CAM]EK.+4y8.light<br>sp P04003 C4BPA_HUMAN.FSLLGHASISC[CAM]TVEN    | 40 |
| 844.160242  | 936.45145   | 15 | [+1]ETIGVWRSPPTC[CAM]EK.+4y17+2.light<br>sp P04003 C4BPA_HUMAN.FSLLGHASISC[CAM]TVEN | 40 |
| 844.160242  | 707.350811  | 15 | [+1]ETIGVWRSPPTC[CAM]EK.+4y16+2.light<br>sp P04003 C4BPA_HUMAN.FSLLGHASISC[CAM]TVEN | 40 |
| 846.163792  | 923.438243  | 15 | [+1]ETIGVWRSPPTC[CAM]EK.+4y12+2.light<br>sp P04003 C4BPA_HUMAN.FSLLGHASISC[CAM]TVEN | 40 |
| 846.163792  | 1004.979846 | 15 | [+1]ETIGVWRSPPTC[CAM]EK.+4y8.heavy<br>sp P04003 C4BPA_HUMAN.FSLLGHASISC[CAM]TVEN    | 40 |
| 846.163792  | 940.45855   | 15 | [+1]ETIGVWRSPPTC[CAM]EK.+4y17+2.heavy<br>sp P04003 C4BPA_HUMAN.FSLLGHASISC[CAM]TVEN | 40 |
| 846.163792  | 711.35791   | 15 | [+1]ETIGVWRSPPTC[CAM]EK.+4y16+2.heavy<br>sp P04003 C4BPA_HUMAN.FSLLGHASISC[CAM]TVEN | 40 |
|             |             |    | [+1]ETIGVWRSPPTC[CAM]EK.+4y12+2.heavy                                               |    |

The transitions for the C4BPA\_HUMAN protein were excluded in this study, since the deaminated and non-deaminated peptides could not be resolved chromatographically, which is used as a critical criterion for integrating the corresponding MRM-transition signals. The entries however remained in the method file, contributing to the total cycle time during sample acquisition. For reasons of completeness and integrity of the method description, these transitions remain listed in the MRM transition table.

**Supplemental Table 2** <sup>16</sup>O deamination reactions

| Sample               | ID Nr | TRFE_HUMAN  |             | IGHA1_HUMAN  |             | HPT_HUMAN   |             |
|----------------------|-------|-------------|-------------|--------------|-------------|-------------|-------------|
|                      |       | average     | SEM         | average      | SEM         | average     | SEM         |
| PMM2-CDG             | 001   | 5.53        | 0.64        | 18.30        | 2.80        | 0.70        | 0.70        |
| PMM2-CDG             | 002   | 7.40        | 1.59        | 16.57        | 1.02        | 2.20        | 1.14        |
| PMM2-CDG             | 003   | 5.63        | 0.63        | 13.53        | 0.98        | 2.50        | 1.29        |
| PMM2-CDG             | 004   | 5.47        | 0.96        | 12.70        | 0.23        | 1.73        | 0.18        |
| PMM2-CDG             | 005   | 4.97        | 0.28        | 13.53        | 2.09        | 1.17        | 0.15        |
| AIG11-CDG            | 034   | 4.93        | 0.07        | 9.40         | 2.86        | 2.47        | 1.39        |
| ALG1-CDG             | 036   | 6.70        | 0.87        | 9.10         | 0.06        | 2.67        | 2.67        |
| ALG6-CDG             | 037   | 4.00        | 0.32        | 6.60         | 0.10        | 0.00        | 0.00        |
| MPDU1-CDG            | 038   | 5.67        | 0.32        | 6.20         | 0.23        | 0.00        | 0.00        |
| RFT1-CDG             | 039   | 5.43        | 0.26        | 8.73         | 1.84        | 1.53        | 0.78        |
| healthy              | 007   | 7.37        | 0.93        | 16.00        | 1.76        | 0.00        | 0.00        |
| healthy              | 008   | 5.67        | 0.50        | 13.87        | 1.62        | 5.93        | 0.96        |
| healthy              | 009   | 6.53        | 1.11        | 14.70        | 1.30        | 6.37        | 2.75        |
| healthy              | 010   | 5.40        | 0.45        | 15.97        | 1.34        | 2.50        | 2.50        |
| healthy              | 011   | 6.03        | 1.63        | 14.50        | 4.26        | 3.17        | 3.17        |
| Steatosis            | 012   | 5.23        | 1.45        | 14.50        | 1.88        | 4.87        | 0.38        |
| Steatosis            | 013   | 5.63        | 0.50        | 14.53        | 0.96        | 6.50        | 0.46        |
| Steatosis            | 015   | 4.73        | 0.69        | 15.90        | 3.95        | 4.97        | 0.09        |
| Steatosis            | 016   | 4.67        | 0.48        | 12.57        | 1.38        | 1.47        | 1.47        |
| NASH                 | 014   | 4.77        | 0.23        | 14.30        | 1.50        | 2.03        | 2.03        |
| NASH                 | 017   | 4.93        | 0.75        | 13.57        | 0.90        | 2.90        | 1.46        |
| NASH                 | 018   | 4.43        | 1.03        | 14.00        | 1.95        | 2.53        | 1.75        |
| NASH                 | 019   | 4.80        | 0.65        | 17.83        | 1.35        | 4.83        | 0.86        |
| NASH                 | 020   | 4.40        | 1.28        | 12.00        | 2.61        | 1.57        | 1.57        |
| NASH                 | 021   | 5.33        | 0.81        | 12.07        | 3.34        | 3.50        | 1.92        |
| NASH                 | 022   | 4.43        | 1.03        | 9.00         | 1.54        | 4.23        | 2.14        |
| NASH                 | 023   | 5.73        | 0.42        | 9.33         | 2.31        | 5.70        | 3.69        |
| <b>Total average</b> |       | <b>5.40</b> | <b>0.74</b> | <b>12.94</b> | <b>1.71</b> | <b>2.89</b> | <b>1.31</b> |



**a**

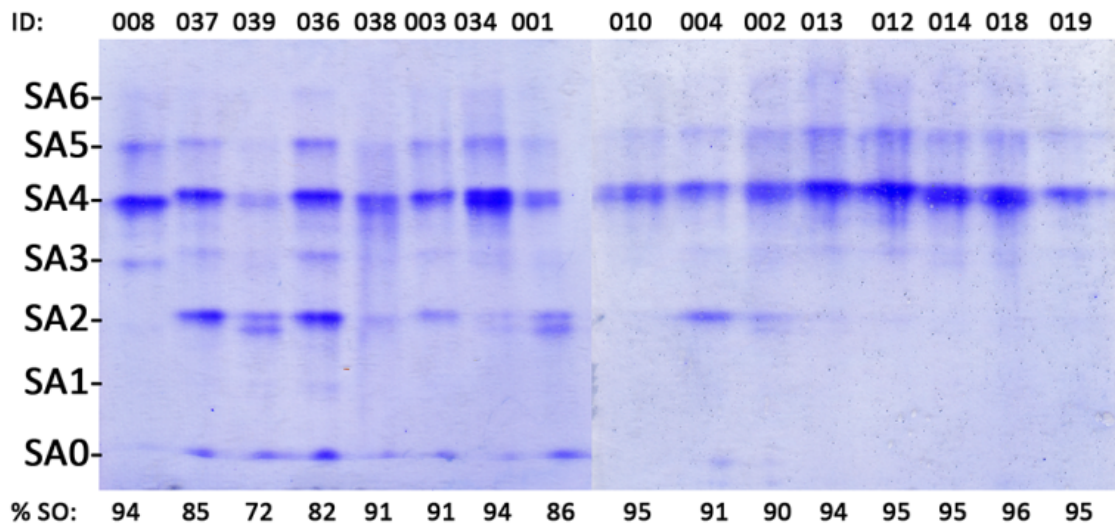

**b**

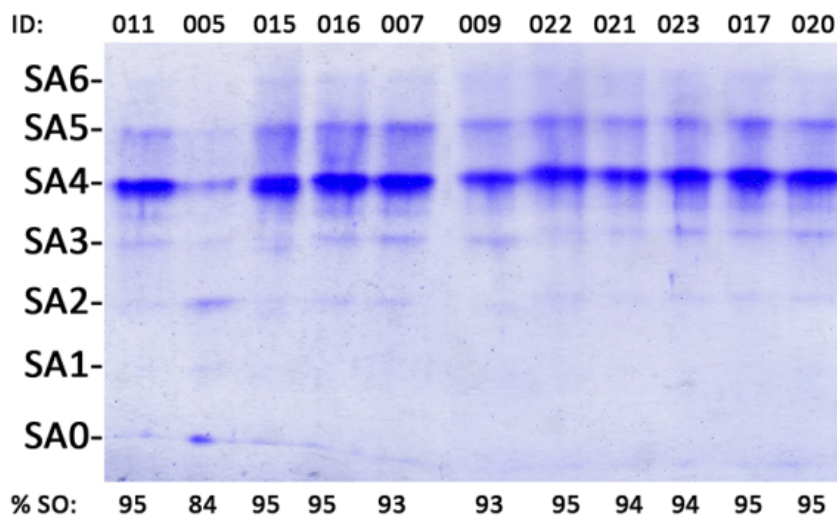

**Supplemental Figure 1.** Isoelectric focusing gel electrophoresis of transferrin of the samples analyzed.

Panel **a**: ID 008 and 010, healthy control serum; ID 037, ALG6-CDG; ID 039, RFT1-CDG; ID 036, Alg1-CDG; ID 038, MPDU1-CDG; ID 003, PMM2-CDG; ID 034, ALG11-CDG; ID 001, PMM2-CDG; ID 004 and 002, PMM2-CDG; ID 013 and 012, steatosis; ID 014-019, NASH. Panel **b**: ID 011, 007 and 009 healthy control serum ; ID 005, PMM2-CDG; ID 015 and 016, steatosis; ID 022-020, NASH. SA0-SA6 indicate the number of sialic acids on the transferrin N-glycans. The percent site occupancy of the corresponding transferrin glycopeptide is indicated below the lanes (% SO = percent site occupancy, ID = unique sample identifier).

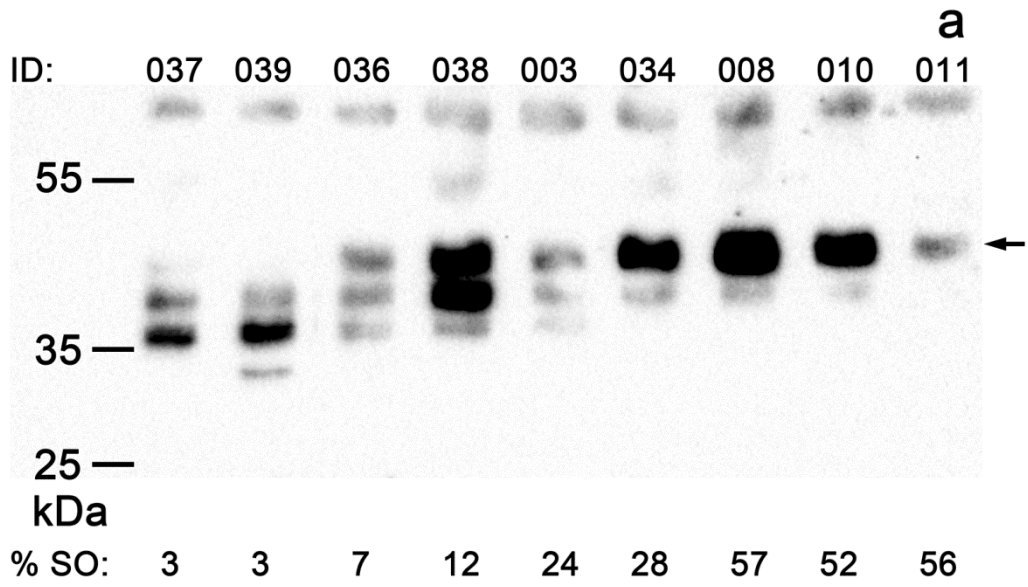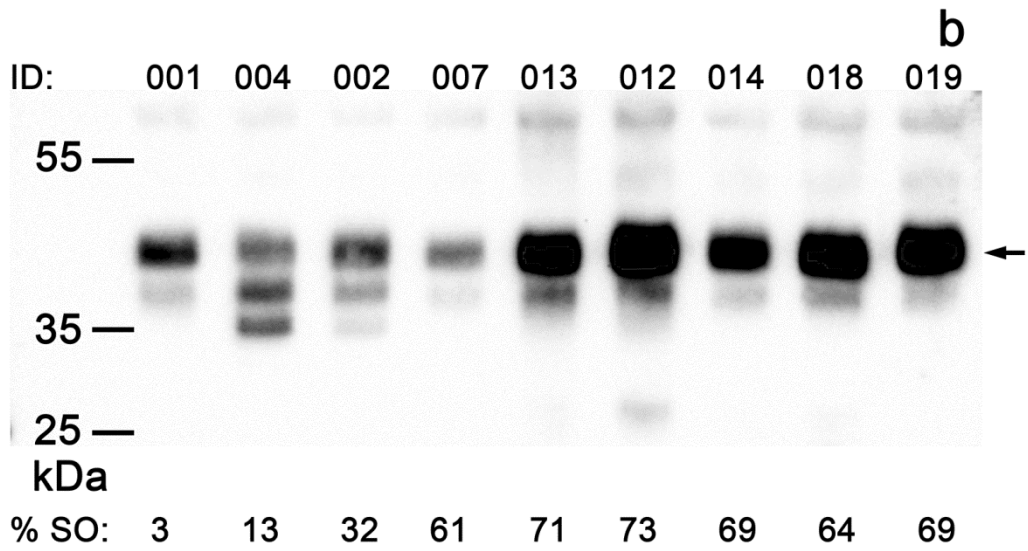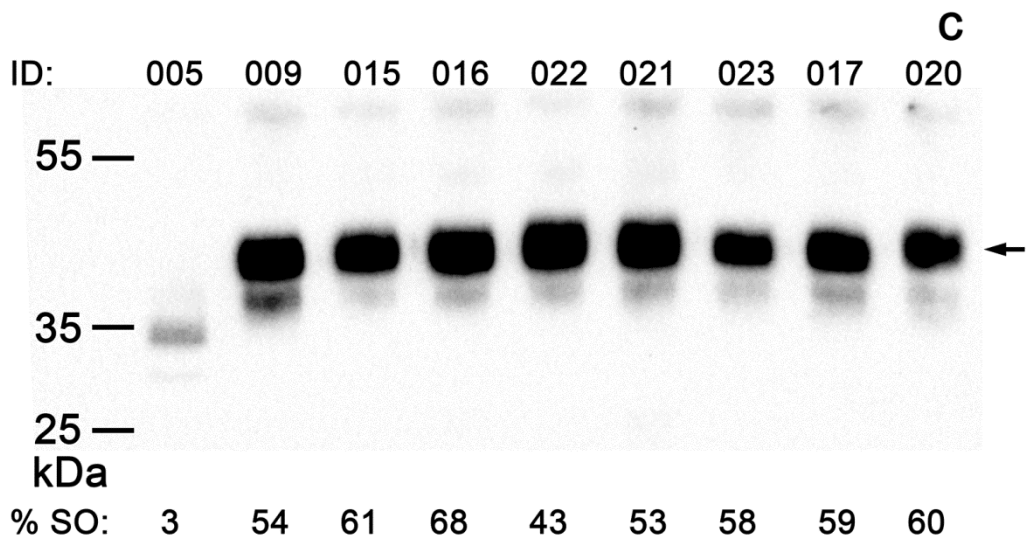

**Supplemental Figure 2.** Western-blot analyses of haptoglobin of the samples analyzed.

Panel **a**: ID 037, ALG6-CDG; ID 039, RFT1-CDG; ID 036, Alg1-CDG; ID 038, MPDU1-CDG; ID 003, PMM2-CDG; ID 034, ALG11-CDG; ID 008-011, healthy control serum. Panel **b**: ID 001-002, PMM2-CDG; ID 007, healthy control serum; ID 013-012, steatosis; ID 014-019, NASH. Panel **c**: ID 005, PMM2-CDG, ID 009, healthy control serum; ID 015-016, steatosis; ID 022-020, NASH. The arrows indicate the migration positions of fully glycosylated haptoglobin. The migration positions of the protein molecular weight markers are indicated at the left in kDa. The percent site occupancy of the corresponding haptoglobin glycopeptide is indicated below the lanes (% SO = percent site occupancy, ID = unique sample identifier)

The haptoglobin Western blot banding of ID 001 does not agree with a PMM2-CDG phenotype. The same sample however shows a typical isoelectric focusing pattern as observed with PMM2-CDG with increased proportions of SA2 and SA0 bands (Supplemental Figure 1). Furthermore, the site occupancy for the haptoglobin peptide referring to sample ID 001 was determined to be 3 % by MRM-MS (Table 2), indicating a severe clinical presentation of the PMM2-CDG patient. The isoelectric focusing gel electrophoresis was performed as described earlier.<sup>1</sup>

- 1 Hülsmeyer, A. J., Paesold-Burda, P. & Hennot, T. N-glycosylation site occupancy in serum glycoproteins using multiple reaction monitoring liquid chromatography-mass spectrometry. *Mol Cell Proteomics* **6**, 2132-2138, doi:10.1074/mcp.M700361-MCP200 (2007).

**Supplemental Table 3** Statistical comparison of the CDG and NAFLD disease groups

| Disease groups                 | Two-tailed P values |           |             |             |
|--------------------------------|---------------------|-----------|-------------|-------------|
|                                | TRFE_HUMAN          | HPT_HUMAN | IGHA1_HUMAN | IGHG2_HUMAN |
| CDG severe versus CDG moderate | 0.7143              | 0.0571    | 0.8571      | > 0.9999    |
| CDG moderate versus CDG mild   | 0.7000              | 0.1000    | 0.4000      | > 0.9999    |
| Steatosis versus NASH          | 0.8485              | 0.0727    | 0.1455      | > 0.9999    |

Differences between groups were calculated using the Mann-Whitney statistical test, and were considered significant with  $p < 0.05$ .

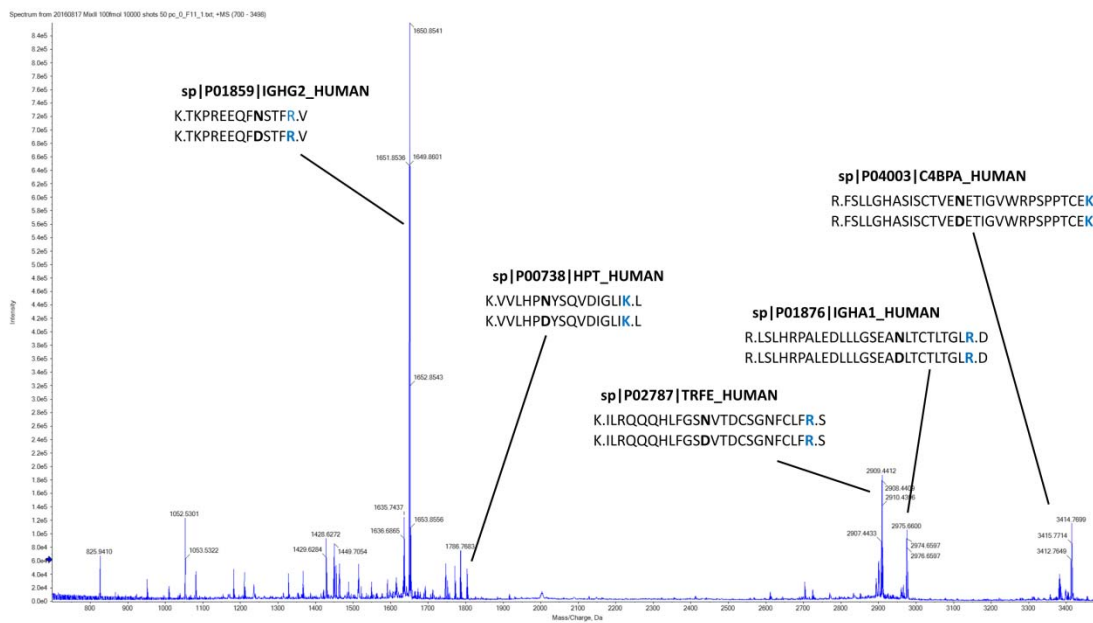

**Supplemental Figure 3.** MALDI-TOF-MS of the standard peptide mix consisting of the synthetic peptides with c-terminal labeled arginine or lysine (bold blue letters) corresponding to the target glycopeptide sequences. The glycosylation site amino acid is marked bold.
